# Supplementary material
Source: Springer Nature journal article supplement (https://www.springermedizin.de/resource/supplementary/12885_2009_2570_MOESM8_ESM.pdf/9462584)

**A**

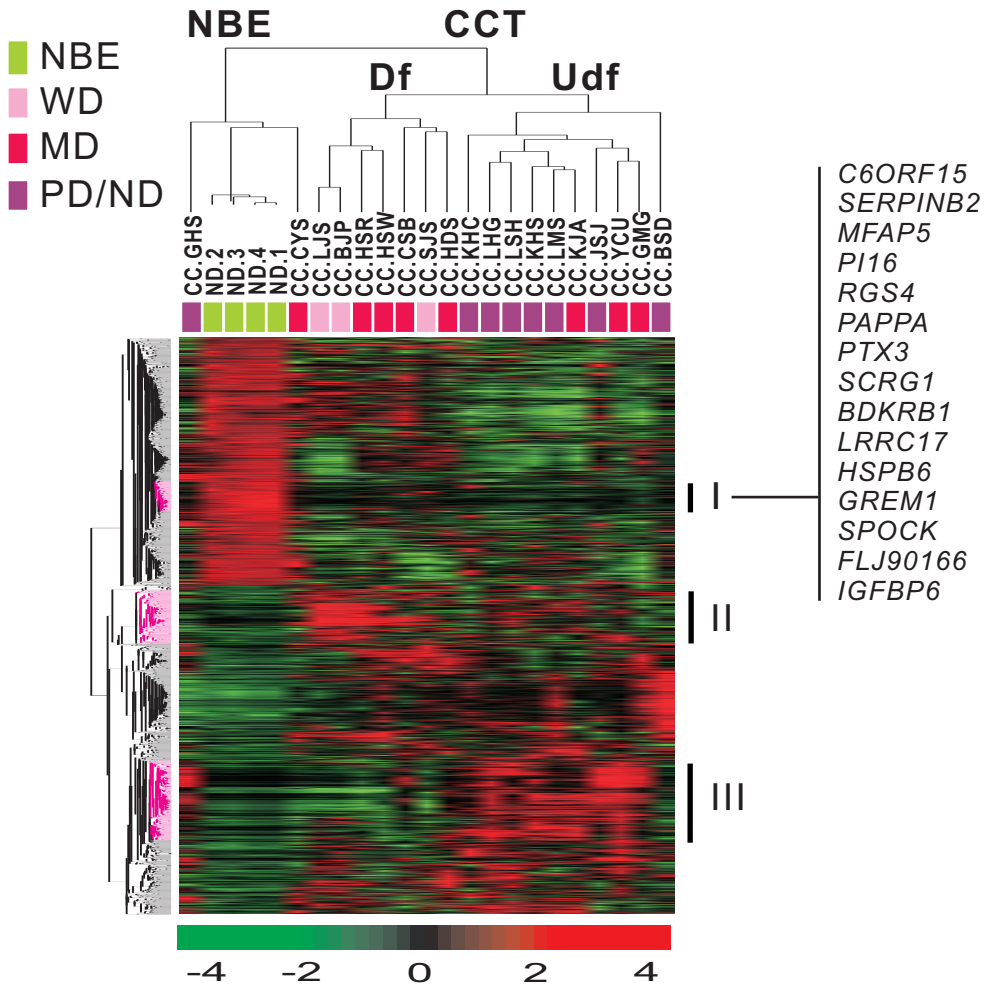

**B**

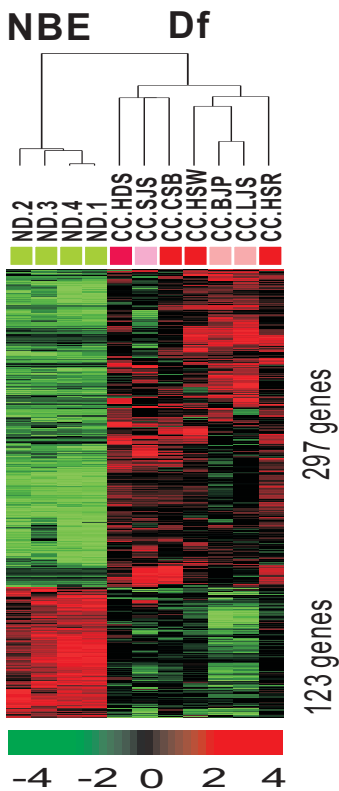

**C**

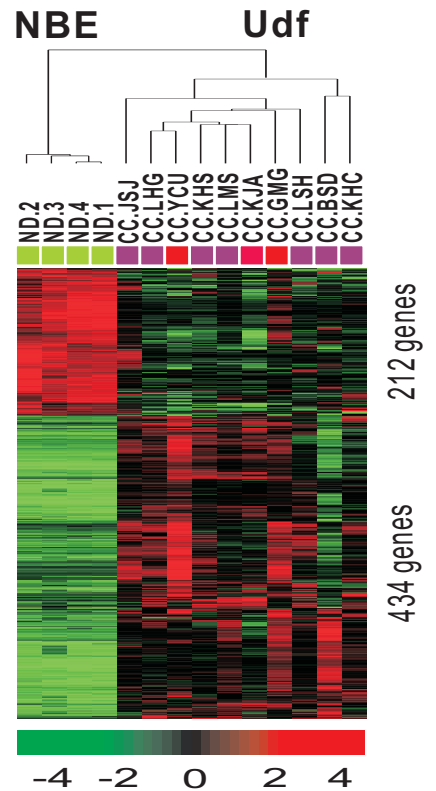

Supplement: MOESM8 [file 9462584]
